# Supplementary material for: Responsible AI in NLP: GUS-Net Span-Level Bias Detection Dataset and Benchmark for Generalizations, Unfairness, and Stereotypes
Source: Research Square preprint supplement (doi:10.21203/rs.3.rs-7623811/v1), 2025-10-15
Supplement: Supplementary file 1 [file 5e651816da086d26a906c7d0.docx]

Authorship Contribution Statement:

**Maximus Powers**: Data curation; Software; Writing - original draft; Writing - review & editing

**Shaina Raza**: Supervision; Writing - review & editing

**Alex Chang**: Writing - review & editing; Validation

Rehana Riaz: Writing - review & editing

**Umang Mavani**: Software; Validation

**Harshitha Reddy Jonala**: Software; Validation

**Ansh Tiwari**: Software; Validation

**Hua Wei**: Supervision; Writing - review & editing
